# Supplementary material for: Salvaging high-quality genomes of microbial species from a meromictic lake using a hybrid sequencing approach
Source: PubMed Central journal article supplement (PMC8382752; doi:10.1038/s42003-021-02510-6), 2021-08-23
Supplement: 42003_2021_2510_MOESM2_ESM.pdf [file 42003_2021_2510_MOESM2_ESM.pdf]

1  
2  
3  
4  
5  
6  
7  
8  
9  
10  
11  
12  
13  
14  
15  
16  
17  
18  
19

## Supplementary Information

### Salvaging high-quality genomes of microbial species from a meromictic lake using a hybrid sequencing approach

Yu-Hsiang Chen<sup>1,2,3</sup>, Pei-Wen Chiang<sup>3</sup>, Denis Yu Rogozin<sup>4,5</sup>, Andrey G.

Degermendzhy<sup>4</sup>, Hsiu-Hui Chiu<sup>3</sup>, Sen-Lin Tang<sup>2,3\*</sup>

<sup>1</sup>Bioinformatics Program, Taiwan International Graduate Program, National Taiwan University, Taipei, Taiwan

<sup>2</sup>Bioinformatics Program, Institute of Information Science, Taiwan International Graduate Program, Academia Sinica, Taipei, Taiwan

<sup>3</sup>Biodiversity Research Center, Academia Sinica, Taipei, Taiwan

<sup>4</sup>Institute of Biophysics, Siberian Division of Russian Academy of Sciences, Krasnoyarsk, Russia

<sup>5</sup>Siberian Federal University, Krasnoyarsk, Russia

\* Corresponding author

Biodiversity Research Center, Academia Sinica

E-mail: sltang@gate.sinica.edu.tw

Tel: +886-2-27893863

Fax: +886-2-27890844

20 **Supplementary Figures**

21

22

23

24

25

26

27

28

29

30

31

32

33

34

35

36

37

38

39

40

41

42

43

44

45

46

47

48

49

50

51

52

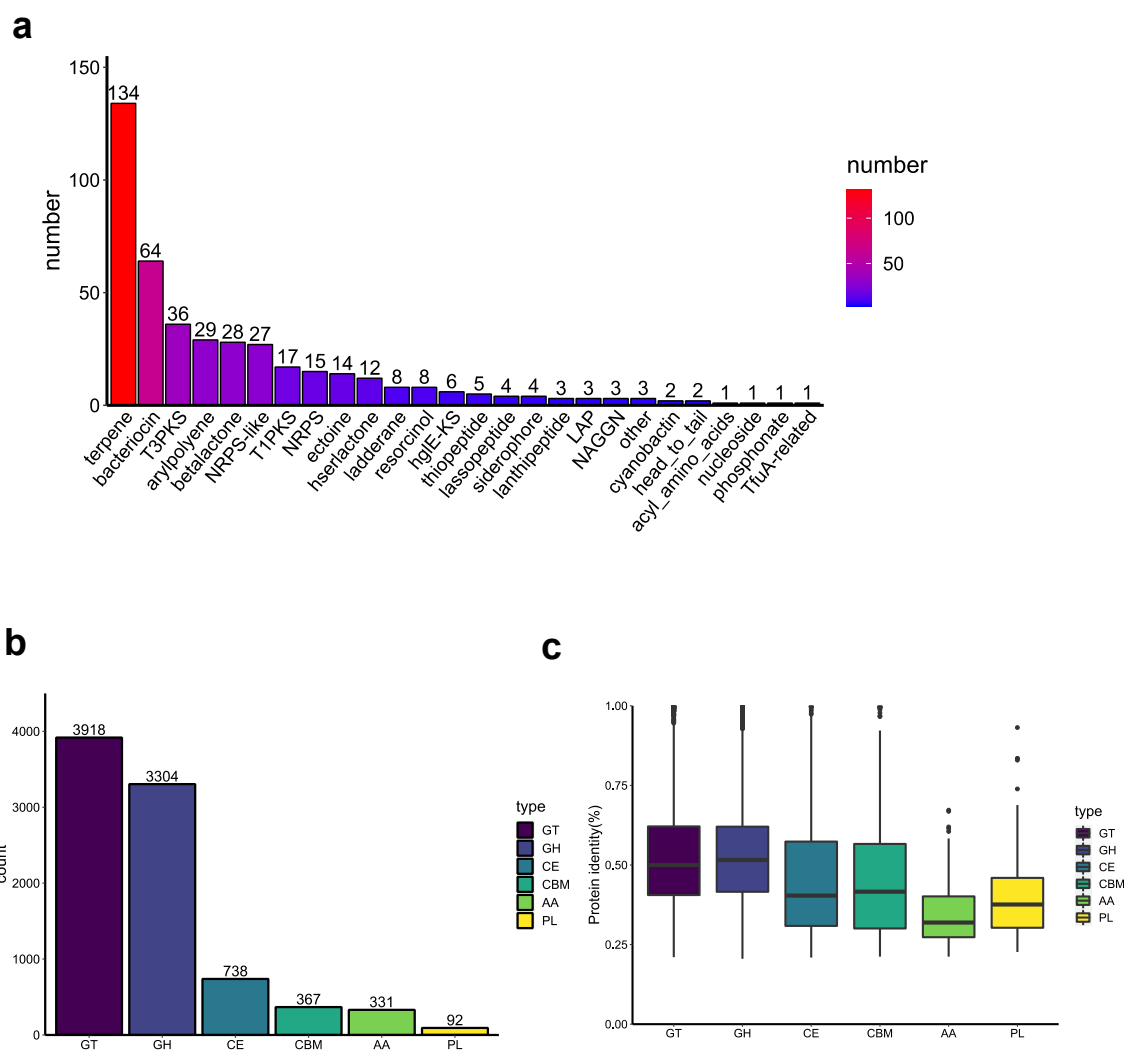

**Supplementary Figure 1. Predicted secondary metabolite biosynthetic clusters and carbohydrate active-enzymes from recovered MAGs.** **a.** The numbers of different types of BGCs identified from recovered MAGs by antiSMASH 5.0. The description of different types of secondary metabolite clusters can be found in the glossary from antiSMASH (<https://docs.antismash.secondarymetabolites.org/glossary/>). **b.** The numbers of different types of CAZymes identified from MAGs using dbCAN 5.0. **c.** Distribution of protein identities between newly identified CAZymes and their best hits in the NCBI nr database. The center line represents median, box limits represent upper and lower quartiles, whisker represents 1.5X interquartile range, and black dots represent outliers. Abbreviations in figure S1a: T3PKS, Type III Polyketide synthase

53 (PKS); NPRS, Non-ribosomal peptide synthetase cluster; hglE-KS, heterocyst  
54 glycolipid synthase-like PKS; LAP, Linear azol(in)e-containing peptides; NAGGN, N-  
55 acetylglutaminyglutamine amide; head\_to\_tail, Head-to-tail cyclised cluster;  
56 acyl\_amino\_acids, N-acyl amino acid cluster; TfuA-related; TfuA-related ribosomally  
57 synthesized and post-translationally modified peptides. Abbreviation in figure S2b:  
58 c:GT, GlycosylTransferase; GH, Glycoside Hydrolase; CE, Carbohydrate esterase;  
59 CBM, Carbohydrate-Binding Module; AA, Auxiliary Activity; PL, Polysaccharide  
60 Lyase.

61

62

63  
64  
65  
66  
67  
68  
69  
70  
71  
72  
73  
74  
75  
76  
77  
78  
79  
80  
81  
82  
83  
84  
85  
86  
87  
88  
89  
90  
91  
92  
93  
94  
95

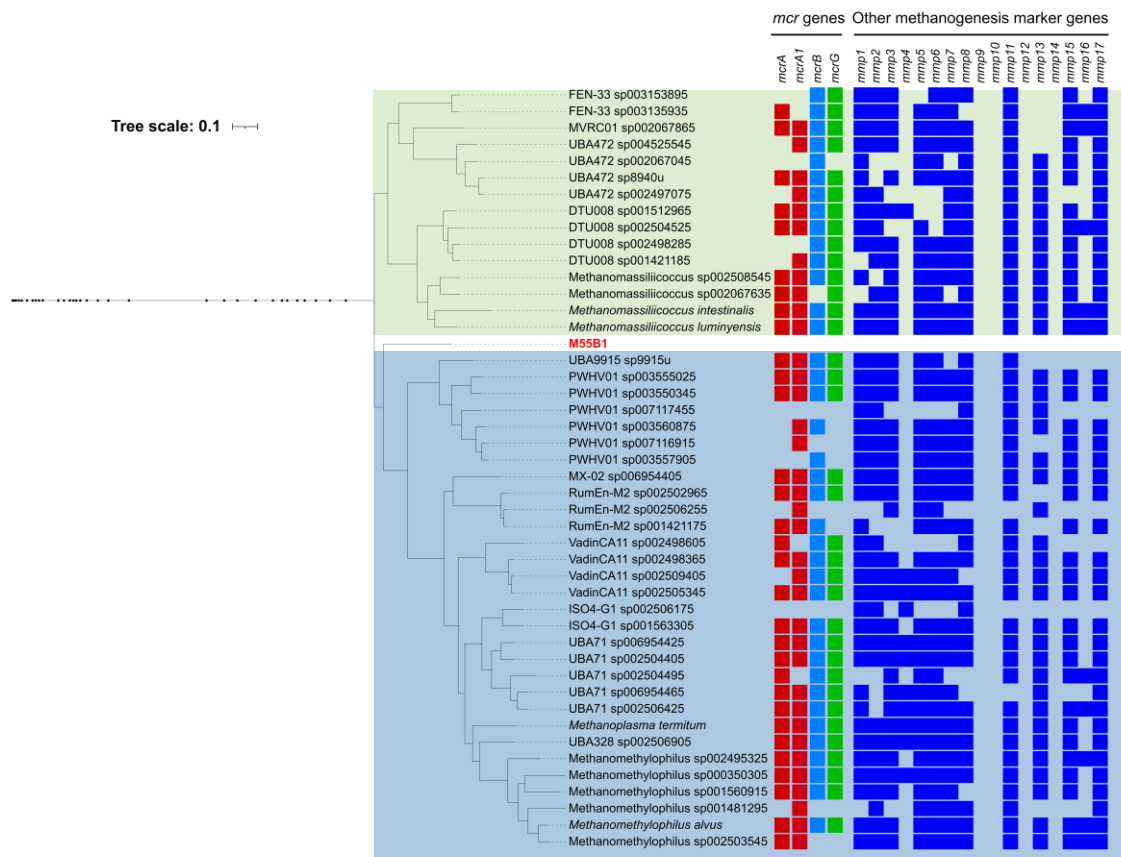

Supplementary Figure 2. Pruned phylogenomic tree of *Methanomassiliococcales* and presence of methanogenesis marker genes in MAGs. The tree contains GTDB representative genomes of host-associated (highlighted in blue) and environmental clades (highlighted in green) in the *Methanomassiliococcales* order. The genomes are annotated with Pfam and KEGG orthologous genes by EnrichM. The methanogenesis markers were selected according to Borrel *et al* (2014)<sup>1,2</sup>. KO numbers and Pfam IDs are listed in Table S2. The colored tiles indicate that the gene is present. Scale bar represents changes per amino acid site. Abbreviation: mmp, methanogenesis marker protein.

96  
97  
98  
99  
100  
101  
102  
103  
104  
105  
106  
107  
108  
109  
110  
111  
112  
113  
114  
115  
116  
117  
118  
119  
120  
121  
122

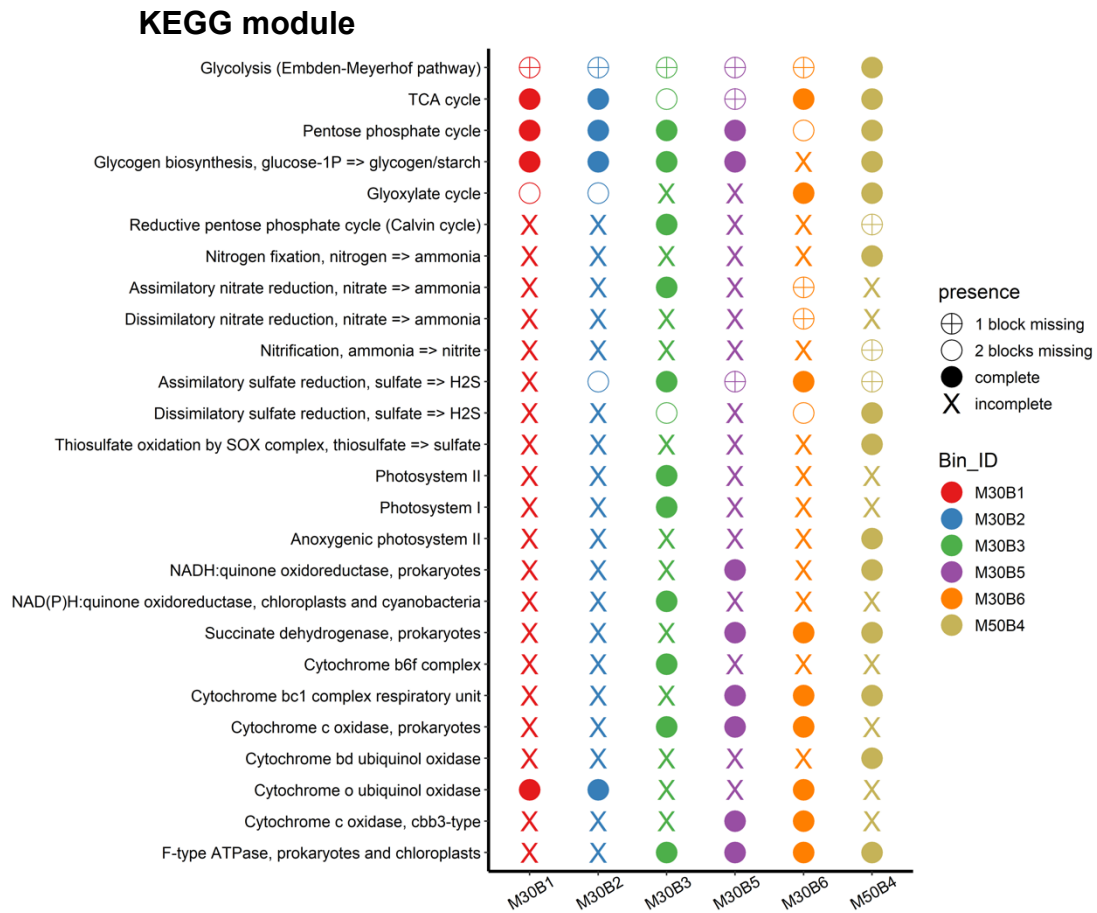

**Supplementary Figure 3. Summary of metabolic features in the newly recovered complete MAGs.**

The genomes are annotated with KEGG orthologues, and the completeness of the metabolic pathways is determined by EnrichM. The KEGG module numbers of each metabolic pathway are listed in Table S2. Each KEGG module is made of multiple functional units (blocks). Missing blocks represents missing gene(s) that form a functional unit. Incomplete modules indicate that more than two blocks are missing.

123  
 124  
 125  
 126  
 127  
 128  
 129  
 130  
 131  
 132  
 133  
 134  
 135  
 136  
 137  
 138  
 139  
 140  
 141  
 142  
 143  
 144  
 145  
 146  
 147  
 148  
 149  
 150  
 151  
 152  
 153  
 154  
 155

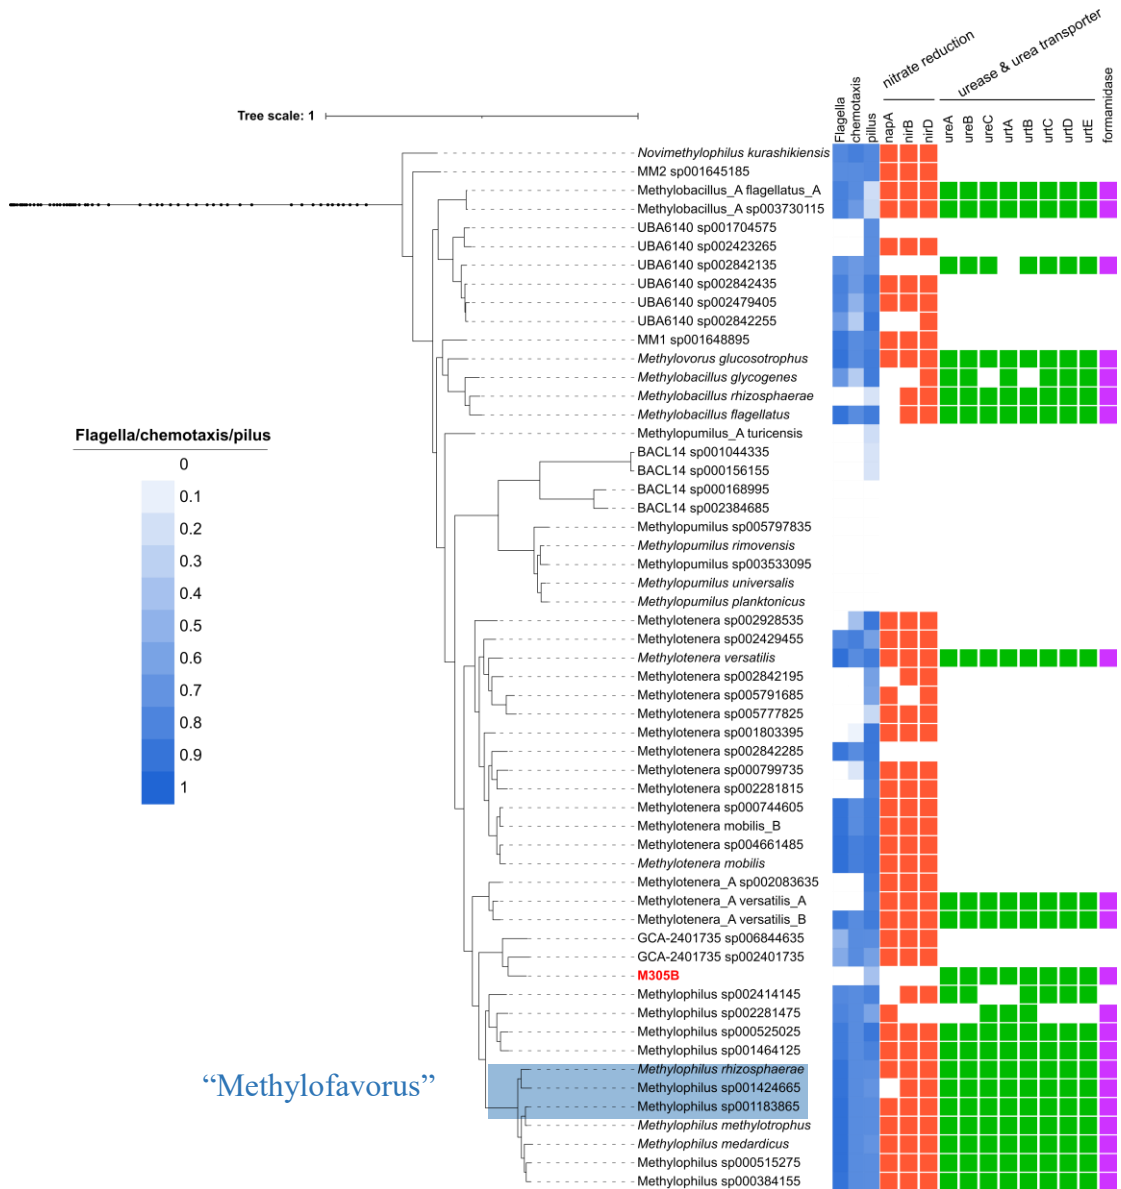

**Supplementary Figure 4. Pruned phylogenomic tree of *Methylophilaceae*.**

The tree contains GTDB representative genomes in the family *Methylophilaceae*. The genomes are annotated with Pfam and KEGG orthologous genes by EnrichM. The genes are selected according to Salcher *et al.*<sup>3</sup>. KO numbers and Pfam IDs are listed in Table S3. The colored tiles indicate that the gene is present. The heatmap represents the proportions calculated by dividing the number of flagella, chemotaxis, and pilus-related genes found in the genome with related gene numbers in the KEGG database (list in Table S2). The scale bar represents changes per amino acid site.

156 **Supplementary Table 1. Statistics on Nanopore and Illumina reads**

|                         | <b>3.0m</b> | <b>5.0m</b> | <b>5.5m</b> |
|-------------------------|-------------|-------------|-------------|
| <b>Nanopore reads</b>   |             |             |             |
| Mean read length        | 2,063       | 1,000       | 7,006       |
| Mean read quality       | 10.6        | 11.1        | 11.6        |
| Median read length      | 761         | 472         | 3,669       |
| Median read quality     | 11.1        | 11.3        | 11.9        |
| Number of reads         | 6,705,136   | 12,569,375  | 683,928     |
| Read length N50         | 5,578       | 1,775       | 13,545      |
| Total bases             | 13,83 Gbp   | 12,57 Gbp   | 4,79 Gbp    |
| Top 5 longest reads :   |             |             |             |
| <b>1.</b>               | 150,131     | 133,860     | 133,934     |
| <b>2.</b>               | 132,395     | 130,047     | 120,861     |
| <b>3.</b>               | 128,047     | 128,699     | 114,105     |
| <b>4.</b>               | 121,232     | 123,796     | 114,062     |
| <b>5.</b>               | 120,736     | 123,662     | 112,369     |
| <b>Illumina reads</b>   |             |             |             |
| Total reads (F+R)       | 486,655,848 | 579,511,508 | 509,594,810 |
| Sequence length (bp)    | 45-100      | 45-100      | 45-100      |
| Mean read length (F, R) | 86, 91      | 91, 90      | 90, 93      |
| Total bases             | 43.27 gbp   | 52.53 gbp   | 46.74 gbp   |
| Q20 bases               | 42.12 gbp   | 52.53 gbp   | 45.82 gbp   |
| Q30 bases               | 38.06 gbp   | 52.53 gbp   | 42.41 gbp   |

157

158

159

160

161

162

163

164

165

**Supplementary Table 2. KEGG Orthology and Pfam families used in this study**

| Genes                     | Proteins/ functions                                                                                   | KEGG/TIGRFAMs # |
|---------------------------|-------------------------------------------------------------------------------------------------------|-----------------|
| <b>Methanogenesis</b>     |                                                                                                       |                 |
| <i>mcrA</i>               | Methyl-CoM reductase subunit A                                                                        | K00399          |
| <i>mcrA2</i>              | Methyl-CoM reductase subunit A2                                                                       | K00400          |
| <i>mcrB</i>               | Methyl-CoM reductase subunit beta                                                                     | K00401          |
| <i>mcrG</i>               | Methyl-CoM reductase subunit G                                                                        | K00402          |
| <i>mmp1</i>               | Methanogenesis marker protein 1                                                                       | TIGR03266       |
| <i>mmp2</i>               | Methanogenesis marker protein 2                                                                       | TIGR03267       |
| <i>mmp3</i>               | Methanogenesis marker protein 3                                                                       | TIGR03268       |
| <i>mmp4</i>               | Methanogenesis marker protein 4                                                                       | TIGR03270       |
| <i>mmp5</i>               | Methanogenesis marker protein 5                                                                       | TIGR03271       |
| <i>mmp6</i>               | Methanogenesis marker protein 6                                                                       | TIGR03272       |
| <i>mmp7</i>               | Methanogenesis marker protein 7                                                                       | TIGR03274       |
| <i>mmp8</i>               | Methanogenesis marker protein 8                                                                       | TIGR03275       |
| <i>mmp9</i>               | Methanogenesis marker protein 9                                                                       | TIGR03277       |
| <i>mmp10</i>              | Methanogenesis marker protein 10<br>(putative methyl coenzyme M reductase-arginine methyltransferase) | TIGR03278       |
| <i>mmp11</i>              | Methanogenesis marker protein 11                                                                      | TIGR03280       |
| <i>mmp12</i>              | Methanogenesis marker protein 12                                                                      | TIGR03281       |
| <i>mmp13</i>              | Methanogenesis marker protein 13                                                                      | TIGR03282       |
| <i>mmp14</i>              | Methanogenesis marker protein 14                                                                      | TIGR03285       |
| <i>mmp15</i>              | Methanogenesis marker protein 15                                                                      | TIGR03286       |
| <i>mmp16</i>              | Methanogenesis marker protein 16                                                                      | TIGR03287       |
| <i>mmp17</i>              | Methanogenesis marker protein 17                                                                      | TIGR03291       |
| <b>Metabolic pathways</b> |                                                                                                       |                 |
|                           | Glycolysis (Embden-Meyerhof pathway)                                                                  | M00001          |
|                           | TCA cycle                                                                                             | M00009          |
|                           | Pentose phosphate cycle                                                                               | M00004          |
|                           | Glycogen biosynthesis                                                                                 | M00854          |
|                           | Glyoxylate cycle                                                                                      | M00012          |



|                   |                                                                |        |
|-------------------|----------------------------------------------------------------|--------|
|                   | Reductive pentose phosphate cycle                              | M00165 |
|                   | Nitrogen fixation                                              | M00175 |
|                   | Assimilatory nitrate reduction                                 | M00531 |
|                   | Dissimilatory nitrate reduction                                | M00530 |
|                   | Nitrification, ammonia => nitrite                              | M00528 |
|                   | Assimilatory sulfate reduction, sulfate => H2S                 | M00176 |
|                   | Dissimilatory sulfate reduction, sulfate => H2S                | M00596 |
|                   | Thiosulfate oxidation by SOX complex                           | M00595 |
|                   | Photosystem II                                                 | M00161 |
|                   | Photosystem I                                                  | M00161 |
|                   | Anoxygenic photosystem II                                      | M00597 |
|                   | NADH:quinone oxidoreductase, prokaryotes                       | M00144 |
|                   | NAD(P)H:quinone oxidoreductase, chloroplasts and cyanobacteria | M00145 |
|                   | Succinate dehydrogenase, prokaryotes                           | M00149 |
|                   | Cytochrome b6f complex                                         | M00162 |
|                   | Cytochrome bc1 complex respiratory unit                        | M00151 |
|                   | Cytochrome c oxidase, prokaryotes                              | M00155 |
|                   | Cytochrome bd ubiquinol oxidase                                | M00153 |
|                   | Cytochrome o ubiquinol oxidase                                 | M00417 |
|                   | Cytochrome c oxidase, cbb3-type                                | M00156 |
| <b>Flagellum</b>  |                                                                |        |
| <i>flhG, fleN</i> | flagellar biosynthesis protein FlhG                            | K04562 |
| <i>flhB2</i>      | flagellar biosynthesis protein                                 | K04061 |
| <i>flgA</i>       | flagella basal body P-ring formation protein                   | K02386 |
| <i>flgB</i>       | flagellar basal-body rod protein FlgB                          | K02387 |
| <i>flgC</i>       | flagellar basal-body rod protein FlgC                          | K02388 |
| <i>flgD</i>       | flagellar basal-body rod modification protein                  | K02389 |
| <i>flgE</i>       | flagellar hook protein FlgE                                    | K02390 |
| <i>flgF</i>       | flagellar basal-body rod protein FlgF                          | K02391 |
| <i>flgG</i>       | flagellar basal-body rod protein FlgG                          | K02392 |
| <i>flgH</i>       | flagellar L-ring protein precursor FlgH                        | K02393 |

|                    |                                                  |        |
|--------------------|--------------------------------------------------|--------|
| <i>flgI</i>        | flagellar P-ring protein precursor FlgI          | K02394 |
| <i>flgJ</i>        | flagellar protein FlgJ                           | K02395 |
| <i>flgK</i>        | flagellar hook-associated protein 1 FlgK         | K02396 |
| <i>flgL</i>        | flagellar hook-associated protein 3 FlgL         | K02397 |
| <i>flgM</i>        | negative regulator of flagellin synthesis FlgM   | K02398 |
| <i>flgN</i>        | flagella synthesis protein FlgN                  | K02399 |
| <i>flhA</i>        | flagellar biosynthesis protein FlhA              | K02400 |
| <i>flhB</i>        | flagellar biosynthetic protein FlhB              | K02401 |
| <i>flhC</i>        | flagellar transcriptional activator FlhC         | K02402 |
| <i>flhD</i>        | flagellar transcriptional activator FlhD         | K02403 |
| <i>flhF</i>        | flagellar biosynthesis protein FlhF              | K02404 |
| <i>fliA</i>        | RNA polymerase sigma factor for flagellar operon | K02405 |
| <i>fliC</i>        | flagellin                                        | K02406 |
| <i>fliD</i>        | flagellar hook-associated protein 2              | K02407 |
| <i>fliE</i>        | flagellar hook-basal body complex protein FliE   | K02408 |
| <i>fliF</i>        | flagellar M-ring protein FliF                    | K02409 |
| <i>fliG</i>        | flagellar motor switch protein FliG              | K02410 |
| <i>fliH</i>        | flagellar assembly protein FliH                  | K02411 |
| <i>fliI</i>        | flagellum-specific ATP synthase [EC:3.6.3.14]    | K02412 |
| <i>fliJ</i>        | flagellar FliJ protein                           | K02413 |
| <i>fliK</i>        | flagellar hook-length control protein FliK       | K02414 |
| <i>fliL</i>        | flagellar FliL protein                           | K02415 |
| <i>fliM</i>        | flagellar motor switch protein FliM              | K02416 |
| <i>fliNY, fliN</i> | flagellar motor switch protein FliN/FliY         | K02417 |
| <i>fliOZ, fliO</i> | flagellar protein FliO/FliZ                      | K02418 |
| <i>fliP</i>        | flagellar biosynthetic protein FliP              | K02419 |
| <i>fliQ</i>        | flagellar biosynthetic protein FliQ              | K02420 |
| <i>fliR</i>        | flagellar biosynthetic protein FliR              | K02421 |
| <i>fliS</i>        | flagellar protein FliS                           | K02422 |
| <i>fliT</i>        | flagellar protein FliT                           | K02423 |
| <i>flbT</i>        | flagellar protein FlbT                           | K06601 |
| <i>flaF</i>        | flagellar protein FlaF                           | K06602 |

|                   |                                                                                        |        |
|-------------------|----------------------------------------------------------------------------------------|--------|
| <i>flaG</i>       | flagellar protein FlaG                                                                 | K06603 |
| <i>flaI</i>       | flagellar rod protein FlaI                                                             | K06604 |
| <b>Chemotaxis</b> |                                                                                        |        |
| <i>motA</i>       | chemotaxis protein MotA                                                                | K02556 |
| <i>motB</i>       | chemotaxis protein MotB                                                                | K02557 |
| <i>mcp</i>        | methyl-accepting chemotaxis protein                                                    | K03406 |
| <i>cheA</i>       | two-component system, chemotaxis family, CheA<br>[EC:2.7.13.3]                         | K03407 |
| <i>cheW</i>       | purine-binding chemotaxis protein CheW                                                 | K03408 |
| <i>cheX</i>       | chemotaxis protein CheX                                                                | K03409 |
| <i>cheC</i>       | chemotaxis protein CheC                                                                | K03410 |
| <i>cheD</i>       | chemotaxis protein CheD [EC:3.5.1.44]                                                  | K03411 |
| <i>cheB</i>       | two-component system, chemotaxis family, response<br>regulator CheB [EC:3.1.1.61]      | K03412 |
| <i>cheY</i>       | two-component system, chemotaxis family, response<br>regulator CheY                    | K03413 |
| <i>cheZ</i>       | chemotaxis protein CheZ                                                                | K03414 |
| <i>cheV</i>       | two-component system, chemotaxis family, response<br>regulator CheV                    | K03415 |
| <b>Pilus</b>      |                                                                                        |        |
| <i>pilA</i>       | type IV pilus assembly protein PilA                                                    | K02650 |
| <i>flp, pilA</i>  | pilus assembly protein Flp/PilA                                                        | K02651 |
| <i>pilB</i>       | type IV pilus assembly protein PilB                                                    | K02652 |
| <i>pilC</i>       | type IV pilus assembly protein PilC                                                    | K02653 |
| <i>pilD, pppA</i> | leader peptidase (prepilin peptidase) / N-<br>methyltransferase [EC:3.4.23.43 2.1.1.-] | K02654 |
| <i>pilE</i>       | type IV pilus assembly protein PilE                                                    | K02655 |
| <i>pilF</i>       | type IV pilus assembly protein PilF                                                    | K02656 |
| <i>pilG</i>       | twitching motility two-component system response<br>regulator PilG                     | K02657 |
| <i>pilH</i>       | twitching motility two-component system response<br>regulator PilH                     | K02658 |

|                                    |                                                                               |        |
|------------------------------------|-------------------------------------------------------------------------------|--------|
| <i>pilI</i>                        | twitching motility protein PilI                                               | K02659 |
| <i>pilJ</i>                        | twitching motility protein PilJ                                               | K02660 |
| <i>pilK</i>                        | type IV pilus assembly protein PilK                                           | K02661 |
| <i>pilM</i>                        | type IV pilus assembly protein PilM                                           | K02662 |
| <i>pilN</i>                        | type IV pilus assembly protein PilN                                           | K02663 |
| <i>pilO</i>                        | type IV pilus assembly protein PilO                                           | K02664 |
| <i>pilP</i>                        | type IV pilus assembly protein PilP                                           | K02665 |
| <i>pilQ</i>                        | type IV pilus assembly protein PilQ                                           | K02666 |
| <i>pilR, pehR</i>                  | two-component system, NtrC family, response regulator PilR                    | K02667 |
| <i>pilS, pehS</i>                  | two-component system, NtrC family, sensor histidine kinase PilS [EC:2.7.13.3] | K02668 |
| <i>pilT</i>                        | twitching motility protein PilT                                               | K02669 |
| <i>pilU</i>                        | twitching motility protein PilU                                               | K02670 |
| <i>pilV</i>                        | type IV pilus assembly protein PilV                                           | K02671 |
| <i>pilW</i>                        | type IV pilus assembly protein PilW                                           | K02672 |
| <i>pilX</i>                        | type IV pilus assembly protein PilX                                           | K02673 |
| <i>pilY1</i>                       | type IV pilus assembly protein PilY1                                          | K02674 |
| <i>pilY2</i>                       | type IV pilus assembly protein PilY2                                          | K02675 |
| <i>pilZ</i>                        | type IV pilus assembly protein PilZ                                           | K02676 |
| <b>nitrate reductase</b>           |                                                                               |        |
| <i>napA</i>                        | nitrate reductase                                                             | K02567 |
| <i>nirB</i>                        | nitrite reductase                                                             | K00362 |
| <i>nirD</i>                        | nitrite reductase (NADH) small subunit                                        | K00363 |
| <b>Urease and urea transporter</b> |                                                                               |        |
| <i>ureA</i>                        | urease subunit gamma                                                          | K01430 |
| <i>ureB</i>                        | urease subunit beta                                                           | K01429 |
| <i>ureC</i>                        | urease subunit alpha                                                          | K01428 |
| <i>urtA</i>                        | urea transport system substrate-binding protein                               | K11959 |
| <i>urtB</i>                        | urea transport system permease protein                                        | K11960 |
| <i>urtC</i>                        | urea transport system permease protein                                        | K11961 |
| <i>urtD</i>                        | urea transport system ATP-binding protein                                     | K11962 |

|               |                                           |        |
|---------------|-------------------------------------------|--------|
| <i>urtE</i>   | urea transport system ATP-binding protein | K11963 |
| <b>Others</b> |                                           |        |
| formamidase   | formamidase                               | K01455 |

167  
168

169

## 170 **Supplementary References**

- 171 1 Borrel, G. *et al.* Comparative genomics highlights the unique biology of  
172  
173 Methanomassiliicoccales, a Thermoplasmatales-related seventh order of  
174 methanogenic archaea that encodes pyrrolysine. *Bmc Genomics* **15**, doi:Artn  
175 679  
176 10.1186/1471-2164-15-679 (2014).
- 177 2 Zinke, L. A. *et al.* Evidence for non-methanogenic metabolisms in globally  
178 distributed archaeal clades basal to the Methanomassiliicoccales. *Environ*  
179 *Microbiol* **23**, doi:10.1111/1462-2920.15316 (2021).
- 180 3 Salcher, M. M., Schaeffle, D., Kaspar, M., Neuenschwander, S. M. & Ghai, R.  
181 Evolution in action: habitat transition from sediment to the pelagial leads to  
182 genome streamlining in Methylophilaceae. *Isme Journal* **13**, 2764-2777,  
183 doi:10.1038/s41396-019-0471-3 (2019).
- 184
