# Supplementary material for: Salvaging high-quality genomes of microbial species from a meromictic lake using a hybrid sequencing approach
Source: PubMed Central journal article supplement (PMC8382752; doi:10.1038/s42003-021-02510-6), 2021-08-23
Supplement: 42003_2021_2510_MOESM3_ESM.pdf [file 42003_2021_2510_MOESM3_ESM.pdf]

## Description of Additional Supplementary Files

**File name:** Supplementary Data 1

**Description:** Genome qualities and statistics evaluated by CheckM.

**File name:** Supplementary Data 2

**Description:** Taxonomy inference of bins by GTDB-Tk.
